# Supplementary material for: Conformational States of a Bacterial α2-Macroglobulin Resemble Those of Human Complement C3
Source: PubMed Central journal article supplement (PMC3328433; doi:10.1371/journal.pone.0035384), 2012-04-17
Supplement: pone.0035384.s006.pdf [file pone.0035384.s006.pdf]

♦ ♦ ♦

C3 VQKE-----DTPPADLSDQVPTDESETRILLQCTPVAQMTEDAVIDAERLKHLIVTPSGCGEQNMIGMTPT 1021  
 ECAM TALQPGETWATPADGLQNFSPVT-LEGQLLSCKPPLNI-----ARYIKELKAYPYGCLLEQTASGLFPS 1198

C3 VIAVHYLDETEQWEKFGGL-----EKRQGALELIKKGYTQQLAFROPSSAFAAFVKRAPST-WLTAYVVKV 1085  
 ECAM LYT-----NAAQLQALGIKGDSEKRRASVDI---GISRLIQMQRDNGGFALWDKNGDEEYWLTAYVMDF 1260

C3 FSLAVNL-IAIDSQVLCGAVKWLILEKQKPDGVFQEDAPVIHQEMIGGLRNNNEKDMALTAFLVLSLQEA 1154  
 ECAM LVRAGEQGYSPVPTDAINRGNERRLR-----YLQDPGMSIPYADNLKASKFAVQSYAALVLAQQKA 1322

C3 KDICEEQVNSLPGSITKAGDFLEANYMNLQRSYTVAIAGYALAQMGRLKGPLLNKFLTTAKDKNRWEDPG 1224  
 ECAM -----PLGALREIWEHRAD-----AASGLPILQLGVA-----LKTMGDATRGEEA- 1362

C3 KQLYNVEATSYALLALLQLKDFDFVPPVVRWLNEQRYYGGGYGSQTATFMVFQALAQYQKDAPDHQLNL 1294  
 ECAM -----IALALKTPRN-----SDERLWLDYGSLSLRDNALMLSLLLEENKLLPDEQ--- 1406

C3 DVSLQLPSRSKSKITHRIHWESASLIRSEETKENEGFTVTAEGKGQGTLSVVTMYHAKAKDQLTCNKFDLK 1364  
 ECAM ---YTLNLTLSSQAQFGERW-----LSTQESN-----ALFLAARTIQDLPQKQWQAQ 1448

C3 VTIKPAPETEKRPODA--KNTMILEICTRYRGDQDATMSILDISMMTGFAF-DTDDLKQLANGVDRIYSK 1431  
 ECAM TSFSAEQLTGEKAQNSNLNSDQLVTLQVSNSGDQPLWLR-MDASGYPQSAPLPANNVLQIERHILGTDGK 1517

C3 YELDKAFSDRNTLIIYLD-KVSHSEDDCLAFKVHQYFNVELIQPGAVKVYAYYNLEESCTRFYHPEKEDG 1500  
 ECAM SKSLDSLRSGLDVLVWLVQKASNSVPAIV-----VDLLPAGL-----ELENQ 1560

C3 KLNKLCRDELRCRAEENCFIQKSDDKV-TLEERLDKACEPGVDYVYKTRLVKVQLSNDFDEYIMA-LEQT 1568  
 ECAM NL-----ANGSASLEQSGGEVQNLNMQMQAASIKHIEF-RDDRFAAVAVDEYQPVTLVYLARA 1618

C3 IKSQSDEVQVGQQRITFISPIKCRFALKLEEKKHYLMWGLSSDFWGEKPNLSYIIGKDTWVEHWPEDECCQ 1638  
 ECAM VTPG-----TYQVQPMVESM-----YVPQW----- 1639

C3 DEENQKQCQDLGAFTESMVFVFGCPN 1663  
 ECAM -----RATGAEDLLIVRP--- 1653
